# Supplementary material for: A foldon-free prefusion F trimer vaccine for respiratory syncytial virus to reduce off-target immune responses
Source: PubMed Central journal article supplement — Nat Microbiol. 2024 Nov 20;9(12):3254–67. doi: 10.1038/s41564-024-01860-1 (PMC11602707; doi:10.1038/s41564-024-01860-1), 2024-11-20
Supplement: 41564_2024_1860_MOESM2_ESM.pdf [file 41564_2024_1860_MOESM2_ESM.pdf]

## Reporting Summary

Nature Portfolio wishes to improve the reproducibility of the work that we publish. This form provides structure for consistency and transparency in reporting. For further information on Nature Portfolio policies, see our [Editorial Policies](#) and the [Editorial Policy Checklist](#).

### Statistics

For all statistical analyses, confirm that the following items are present in the figure legend, table legend, main text, or Methods section.

- | n/a                                 | Confirmed                                                                                                                                                                                                                                                                                      |
|-------------------------------------|------------------------------------------------------------------------------------------------------------------------------------------------------------------------------------------------------------------------------------------------------------------------------------------------|
| <input type="checkbox"/>            | <input checked="" type="checkbox"/> The exact sample size ( $n$ ) for each experimental group/condition, given as a discrete number and unit of measurement                                                                                                                                    |
| <input type="checkbox"/>            | <input checked="" type="checkbox"/> A statement on whether measurements were taken from distinct samples or whether the same sample was measured repeatedly                                                                                                                                    |
| <input type="checkbox"/>            | <input checked="" type="checkbox"/> The statistical test(s) used AND whether they are one- or two-sided<br><i>Only common tests should be described solely by name; describe more complex techniques in the Methods section.</i>                                                               |
| <input type="checkbox"/>            | <input checked="" type="checkbox"/> A description of all covariates tested                                                                                                                                                                                                                     |
| <input type="checkbox"/>            | <input checked="" type="checkbox"/> A description of any assumptions or corrections, such as tests of normality and adjustment for multiple comparisons                                                                                                                                        |
| <input type="checkbox"/>            | <input checked="" type="checkbox"/> A full description of the statistical parameters including central tendency (e.g. means) or other basic estimates (e.g. regression coefficient) AND variation (e.g. standard deviation) or associated estimates of uncertainty (e.g. confidence intervals) |
| <input type="checkbox"/>            | <input checked="" type="checkbox"/> For null hypothesis testing, the test statistic (e.g. $F$ , $t$ , $r$ ) with confidence intervals, effect sizes, degrees of freedom and $P$ value noted<br><i>Give <math>P</math> values as exact values whenever suitable.</i>                            |
| <input checked="" type="checkbox"/> | <input type="checkbox"/> For Bayesian analysis, information on the choice of priors and Markov chain Monte Carlo settings                                                                                                                                                                      |
| <input checked="" type="checkbox"/> | <input type="checkbox"/> For hierarchical and complex designs, identification of the appropriate level for tests and full reporting of outcomes                                                                                                                                                |
| <input checked="" type="checkbox"/> | <input type="checkbox"/> Estimates of effect sizes (e.g. Cohen's $d$ , Pearson's $r$ ), indicating how they were calculated                                                                                                                                                                    |

*Our web collection on [statistics for biologists](#) contains articles on many of the points above.*

### Software and code

Policy information about [availability of computer code](#)

|                 |                                                                                                                                                                                                                                                                                                                                                                                                                                                                                                                                                                                                                                                                                                                                                                                                                                                            |
|-----------------|------------------------------------------------------------------------------------------------------------------------------------------------------------------------------------------------------------------------------------------------------------------------------------------------------------------------------------------------------------------------------------------------------------------------------------------------------------------------------------------------------------------------------------------------------------------------------------------------------------------------------------------------------------------------------------------------------------------------------------------------------------------------------------------------------------------------------------------------------------|
| Data collection | SEC-MALS data were collected using Chromeleon 7.2.8.0<br>DSF data was collected with QuantStudio Real-Time PCR system software                                                                                                                                                                                                                                                                                                                                                                                                                                                                                                                                                                                                                                                                                                                             |
| Data analysis   | ELISA and VNA (PRNT) titers were calculated with in-house custom made R scripts (R version 3.4.3) based on Gen5™ Data Analysis Software Graph Pad Prism version 10<br>SEC-MALS data were analyzed using Chromeleon 7.2.8.0 and Astra 8.0.0.19 (Wyatt)<br>Statistical analyses for preclinical experiments were performed using SAS version 9.4 (SAS Institute, Inc., Cary, NC, USA)<br>BLI data was analyzed using FortéBio Data Analysis 12.0 software (FortéBio)<br>C3 map was processed using the DeepEMhancer tool within Cosmic2 Gateway (v2.2.0)<br>Motion correction, CTF-estimation, blob particle picking, and particle extraction was performed in cryoSPARC Live v3.2.0<br>Cryo-EM structure was build and checked using ChimeraX (v1.6.1) and MolProbity (v4.5), and refined iteratively using Phenix (v1.20), Coot (v1.2), and ISOLDE (v1.4). |

For manuscripts utilizing custom algorithms or software that are central to the research but not yet described in published literature, software must be made available to editors and reviewers. We strongly encourage code deposition in a community repository (e.g. GitHub). See the Nature Portfolio [guidelines for submitting code & software](#) for further information.

## Data

Policy information about [availability of data](#)

All manuscripts must include a [data availability statement](#). This statement should provide the following information, where applicable:

- Accession codes, unique identifiers, or web links for publicly available datasets
- A description of any restrictions on data availability
- For clinical datasets or third party data, please ensure that the statement adheres to our [policy](#)

The coordinates and EM maps generated in this study have been deposited in the Protein Data Bank and the Electron Microscopy Data Bank under accession codes: PDB 9B2X, EMD-44117. All other data are available in the source data file published with this manuscript.

## Research involving human participants, their data, or biological material

Policy information about studies with [human participants or human data](#). See also policy information about [sex, gender \(identity/presentation\), and sexual orientation](#) and [race, ethnicity and racism](#).

|                                                                    |                                                                                                                                                                                                                                                                                                                                                                     |
|--------------------------------------------------------------------|---------------------------------------------------------------------------------------------------------------------------------------------------------------------------------------------------------------------------------------------------------------------------------------------------------------------------------------------------------------------|
| Reporting on sex and gender                                        | Sera from a human clinical trial were used. The study design of this Phase 2b Study to Assess the Efficacy, Immunogenicity and Safety of an Ad26.RSV.preF-based Regimen in the Prevention of RT PCR-confirmed RSV-mediated Lower Respiratory Tract Disease in Adults Aged 65 Years and Older (NCT03982199) will be published elsewhere and referred to in the text. |
| Reporting on race, ethnicity, or other socially relevant groupings | Sera from a human clinical trial were used. The study design of this Phase 2b Study to Assess the Efficacy, Immunogenicity and Safety of an Ad26.RSV.preF-based Regimen in the Prevention of RT PCR-confirmed RSV-mediated Lower Respiratory Tract Disease in Adults Aged 65 Years and Older (NCT03982199) will be published elsewhere and referred to in the text. |
| Population characteristics                                         | Sera from a human clinical trial were used. The study design of this Phase 2b Study to Assess the Efficacy, Immunogenicity and Safety of an Ad26.RSV.preF-based Regimen in the Prevention of RT PCR-confirmed RSV-mediated Lower Respiratory Tract Disease in Adults Aged 65 Years and Older (NCT03982199) will be published elsewhere and referred to in the text. |
| Recruitment                                                        | Sera from a human clinical trial were used. The study design of this Phase 2b Study to Assess the Efficacy, Immunogenicity and Safety of an Ad26.RSV.preF-based Regimen in the Prevention of RT PCR-confirmed RSV-mediated Lower Respiratory Tract Disease in Adults Aged 65 Years and Older (NCT03982199) will be published elsewhere and referred to in the text. |
| Ethics oversight                                                   | Sera from a human clinical trial were used. The study design of this Phase 2b Study to Assess the Efficacy, Immunogenicity and Safety of an Ad26.RSV.preF-based Regimen in the Prevention of RT PCR-confirmed RSV-mediated Lower Respiratory Tract Disease in Adults Aged 65 Years and Older (NCT03982199) will be published elsewhere and referred to in the text. |

Note that full information on the approval of the study protocol must also be provided in the manuscript.

## Field-specific reporting

Please select the one below that is the best fit for your research. If you are not sure, read the appropriate sections before making your selection.

Life sciences       Behavioural & social sciences       Ecological, evolutionary & environmental sciences

For a reference copy of the document with all sections, see [nature.com/documents/nr-reporting-summary-flat.pdf](https://www.nature.com/documents/nr-reporting-summary-flat.pdf)

## Life sciences study design

All studies must disclose on these points even when the disclosure is negative.

|                 |                                                                                                                                                                                                                                                                                                                                                                                                                                                                                                                                                                                                |
|-----------------|------------------------------------------------------------------------------------------------------------------------------------------------------------------------------------------------------------------------------------------------------------------------------------------------------------------------------------------------------------------------------------------------------------------------------------------------------------------------------------------------------------------------------------------------------------------------------------------------|
| Sample size     | Sample size of the different animal studies described in the manuscript are determined based on power calculations. Historical data for the investigated or similar vaccines were used to guide statistical powering. Sample sizes were calculated using SAS version 9.4 (SAS Institute, Inc., Cary, NC, USA)                                                                                                                                                                                                                                                                                  |
| Data exclusions | All data is included and shown                                                                                                                                                                                                                                                                                                                                                                                                                                                                                                                                                                 |
| Replication     | Binding and neutralization antibody titers were always measured as technical duplicates. Screen for RSV preF-stabilizing substitutions and related experiments were performed in biological triplicate. Three cryo-EM datasets were collected. All attempts at reproduction were successful.                                                                                                                                                                                                                                                                                                   |
| Randomization   | Mice were randomly assigned to groups. For all other experiments samples or wells, were allocated randomly.                                                                                                                                                                                                                                                                                                                                                                                                                                                                                    |
| Blinding        | Investigators were not blinded during ELISA and VNA data collection, but serum samples were randomly mixed onto the measurement plates for ELISA measurements to minimizing group specific biases in data collection. Investigators were blinded during cryo-EM analysis; only 1 protein design was tested so no group blinding was performed. Investigators were not blinded during Octet, DSF, SEC and FACS experiments, since there was no preference towards use of any of the stabilizing substitutions or vaccine candidates and hence there was no scope for bias in unblinded testing. |

# Reporting for specific materials, systems and methods

We require information from authors about some types of materials, experimental systems and methods used in many studies. Here, indicate whether each material, system or method listed is relevant to your study. If you are not sure if a list item applies to your research, read the appropriate section before selecting a response.

## Materials & experimental systems

| n/a                                 | Involved in the study                                           |
|-------------------------------------|-----------------------------------------------------------------|
| <input type="checkbox"/>            | <input checked="" type="checkbox"/> Antibodies                  |
| <input type="checkbox"/>            | <input checked="" type="checkbox"/> Eukaryotic cell lines       |
| <input checked="" type="checkbox"/> | <input type="checkbox"/> Palaeontology and archaeology          |
| <input type="checkbox"/>            | <input checked="" type="checkbox"/> Animals and other organisms |
| <input type="checkbox"/>            | <input checked="" type="checkbox"/> Clinical data               |
| <input checked="" type="checkbox"/> | <input type="checkbox"/> Dual use research of concern           |
| <input checked="" type="checkbox"/> | <input type="checkbox"/> Plants                                 |

## Methods

| n/a                                 | Involved in the study                           |
|-------------------------------------|-------------------------------------------------|
| <input checked="" type="checkbox"/> | <input type="checkbox"/> ChIP-seq               |
| <input checked="" type="checkbox"/> | <input type="checkbox"/> Flow cytometry         |
| <input checked="" type="checkbox"/> | <input type="checkbox"/> MRI-based neuroimaging |

## Antibodies

Antibodies used

CR9501 5 µg/mL (produced in house)  
 RSV90 5 µg/mL (produced in house)  
 RSD5-GL 5 µg/mL (produced in house)  
 ADI-15644 5 µg/mL (produced in house)  
 Goat anti-mouse IgG-HRP (Biorad Cat172-1011) 1:2000 or 1:40000  
 Mab8262 clone 133-1H (Merck) 1:2000  
 Goat anti-human IgG HRP Jackson ImmunoResearch (109-035-098) 1:2000 or 1:3750  
 Anti-human CW800 (Rockland; 609-145-002) 1:10.000

Validation

All antibodies have been published and validated in the respective publications.

## Eukaryotic cell lines

Policy information about [cell lines and Sex and Gender in Research](#)

Cell line source(s)

Human embryonic kidney cell line expi293F (Thermo Fisher; A14527)  
 A549 cells were received from ATCC (CCL-185), a working cell bank was prepared directly.  
 VERO cells were received from the WHO (WHO10-87; 880101), a working cell bank was prepared directly.

Authentication

Authentication was performed by supplier

Mycoplasma contamination

All cell lines were tested as being mycoplasma negative by supplier.

Commonly misidentified lines  
 (See [ICLAC](#) register)

No commonly misidentified cell lines were used in this study

## Animals and other research organisms

Policy information about [studies involving animals; ARRIVE guidelines](#) recommended for reporting animal research, and [Sex and Gender in Research](#)

Laboratory animals

Mouse studies: BALB/c mice, female, 6- to 8-weeks-old at the start of the study  
 Four cynomolgus macaques (2M/2F, approximately 7 years of age at study start)

Wild animals

The study did not involve wild animals.

Reporting on sex

Mouse studies were only performed in female animals. For a careful comparison of induced immune responses between (combinations of) different vaccine candidates, as was the main objective of studies described in the current manuscript, it is important to keep the groups of experimental animals as homogeneous as possible. Therefore, experimental groups (in rodent experiments) were mostly comprised of inbred animals, from the same strain and age, as well as from the same sex. By reducing the variation, group sizes can be smaller, requiring fewer animals to address a specific research question. In the human population, more heterogenous immune responses can be expected. In addition to sex differences, many other factors (eg, genetic background, pre-exposure history, underlying health conditions, and age) contribute to this heterogeneity. Therefore, in later stages of vaccine development, human testing in a heterogenous population comprised of both sexes is part of the vaccine development program. The study in Cynomolgus macaques was performed in two males and two female animals.

Field-collected samples

Study did not involve samples collected from the field.

## Ethics oversight

The clinical study was approved by the ethics committee or institutional review board at each participating center and conducted in accordance with the Declaration of Helsinki and Good Clinical Practice guidelines. All participants provided written informed consent that allows use of the samples in this study. An independent data and safety monitoring committee monitored safety outcomes throughout the trials. The African green monkey study was conducted at the Wake Forest School of Medicine test facility and approved by the IACUC of Wake Forest University (WFU). The cynomolgus macaque study was performed by Alpha Genesis and approved by the IACUC of Alpha Genesis. Mouse studies were conducted at Janssen Vaccines and Prevention B.V. according to the Dutch Animal Experimentation Act and the Guidelines on the Protection of Animals for scientific purposes by the Council of the European Committee after approval by the Centrale Commissie Dierproeven and the Dier Experimenten Commissie of Janssen Vaccines and Prevention B.V. Project license: AVD213002020-10024. Approval codes: RSV23MM01-10024, RSV23MM09-10024, and RSV23MM12-10024

Note that full information on the approval of the study protocol must also be provided in the manuscript.

## Clinical data

Policy information about [clinical studies](#)

All manuscripts should comply with the ICMJE [guidelines for publication of clinical research](#) and a completed [CONSORT checklist](#) must be included with all submissions.

|                             |      |
|-----------------------------|------|
| Clinical trial registration | n.a. |
| Study protocol              | n.a. |
| Data collection             | n.a. |
| Outcomes                    | n.a. |

## Plants

|                       |      |
|-----------------------|------|
| Seed stocks           | n.a. |
| Novel plant genotypes | n.a. |
| Authentication        | n.a. |
